# Supplementary material for: Book Bans in American Libraries: Impact of Politics on Inclusive Content Consumption
Source: Atypon-hosted journal article supplement (doi:10.1287/mksc.2024.0716), 2025-03-14
Supplement: mksc.2024.0716.sm1.pdf [file mksc.2024.0716.sm1.pdf]

# Appendix

Figure A1: Sample of Banned Books

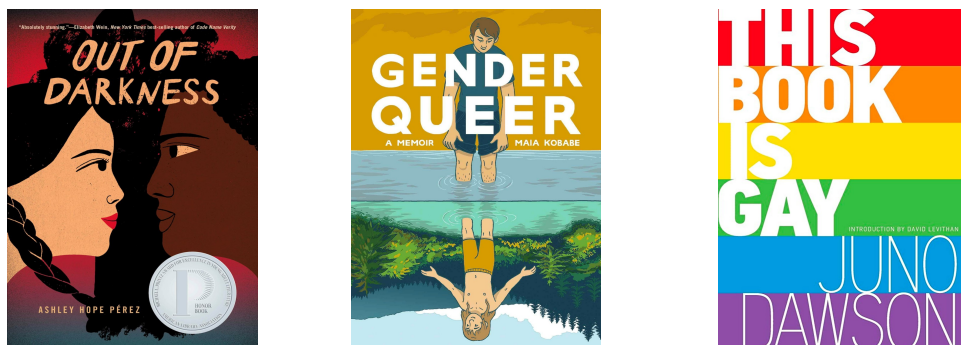

a) Dealing with Race    b) Dealing with Gender    c) Dealing with Sexuality

Note: The figure shows examples of banned books dealing with Race, Gender, and Sexuality respectively.

Table A1: List of Top-25 Banned Book Titles

| Title                     | Genre                   | Primary Author         | Author Gender | Author Race |
|---------------------------|-------------------------|------------------------|---------------|-------------|
| All American Boys         | Young Adult Fiction     | Jason Reynolds         | Male          | Black       |
| All Boys aren't Blue      | Young Adult Non-Fiction | George M. Johnson      | Non-Binary    | Black       |
| Almost Perfect            | Young Adult Fiction     | Brian Katcher          | Male          | White       |
| Being Jazz                | Young Adult Non-Fiction | Jazz Jennings          | Transgender   | White       |
| Beyond Magenta            | Young Adult Non-Fiction | Susan Kuklin           | Female        | White       |
| Dear Martin               | Young Adult Fiction     | Nic Stone              | Female        | Black       |
| Drama                     | Juvenile Fiction        | Raina Telgemeier       | Female        | White       |
| Flamer                    | Young Adult Fiction     | Mike Curato            | Male          | Mixed-Race  |
| Gender Queer              | Comics & Graphic Novels | Maia Kobabe            | Non-Binary    | White       |
| I Am Jazz                 | Juvenile Non-Fiction    | Jazz Jennings          | Transgender   | White       |
| l8r, g8r                  | Young Adult Fiction     | Lauren Myracle         | Female        | White       |
| Lawn Boy                  | Fiction                 | Jonathan Evison        | Male          | White       |
| Melissa                   | Juvenile Fiction        | Alex Gino              | Genderqueer   | White       |
| Monday's Not Coming       | Young Adult Fiction     | Tiffany D. Jackson     | Female        | Black       |
| More Happy Than Not       | Young Adult Fiction     | Adam Silvera           | Male          | Hispanic    |
| Out of Darkness           | Young Adult Fiction     | Ashley Hope Perez      | Female        | White       |
| Real Live Boyfriends      | Young Adult Fiction     | E. Lockhart            | Female        | White       |
| The 57 Bus                | Young Adult Non-Fiction | Dashka Slater          | Female        | White       |
| The Breakaways            | Juvenile Fiction        | Cathy G. Johnson       | Non-Binary    | White       |
| The Infinite Moment of Us | Young Adult Fiction     | Lauren Myracle         | Female        | White       |
| The Truth About Alice     | Young Adult Fiction     | Jennifer Mathieu       | Female        | Hispanic    |
| This Book is Gay          | Young Adult Non-Fiction | Juno Dawson            | Trans Woman   | White       |
| This One Summer           | Young Adult Fiction     | Mariko Tamaki          | Female        | Asian       |
| Two Boys Kissing          | Young Adult Fiction     | David Levithan         | Male          | White       |
| We Are the Ants           | Young Adult Fiction     | Shaun David Hutchinson | Male          | White       |

Note: List of all the 25 banned book titles included in our study along with genre, name of the primary author, their gender and race.

Figure A2: Histogram of Number of Bans per Title

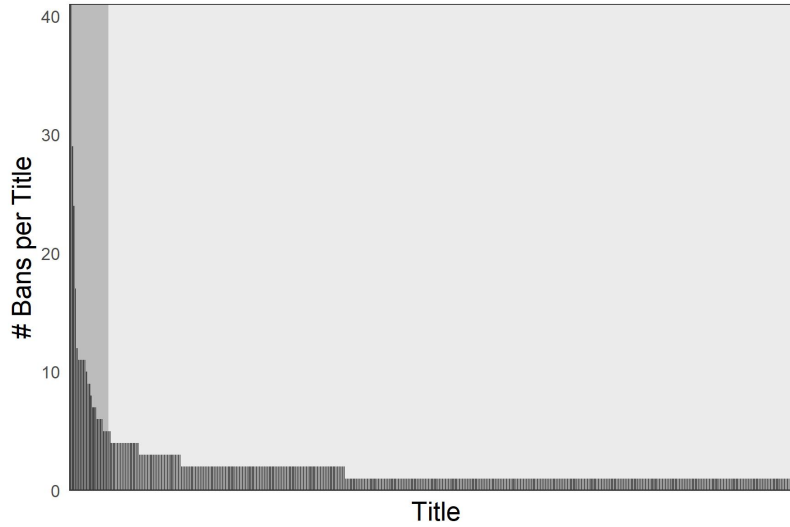

Note: The figure shows the distribution of the number of total ban events per title arranged by the decreasing count of ban events. The area marked represents the sample of banned books considered in our analyses.

## Additional Details on Book Bans

Figure A2 demonstrates the number of times each title is banned in different school districts, with the X axis denoting each title and the Y axis denoting the number of bans. We observe that the distribution is heavily skewed to the left and has a significant long tail of titles that are banned only once. This indicates that some titles are banned more frequently than others. In fact, only 25 banned books contribute to more than 300 of the 940 challenges (30%) and are banned at least five times by different school districts. Books that are banned more than four times each contribute to 38% while books that are banned over three times contribute to 46.5% of the distribution. In summary, only 71 titles are banned at least three times. In our analysis, we focus primarily on the 25 books that face the most challenges from school districts and are shown in the shaded part in Figure A2. Our results remain qualitatively similar to this baseline if we consider all 71 titles that are banned at least three times.

Figure A3: Event Study Estimates using Alternate Event Definitions

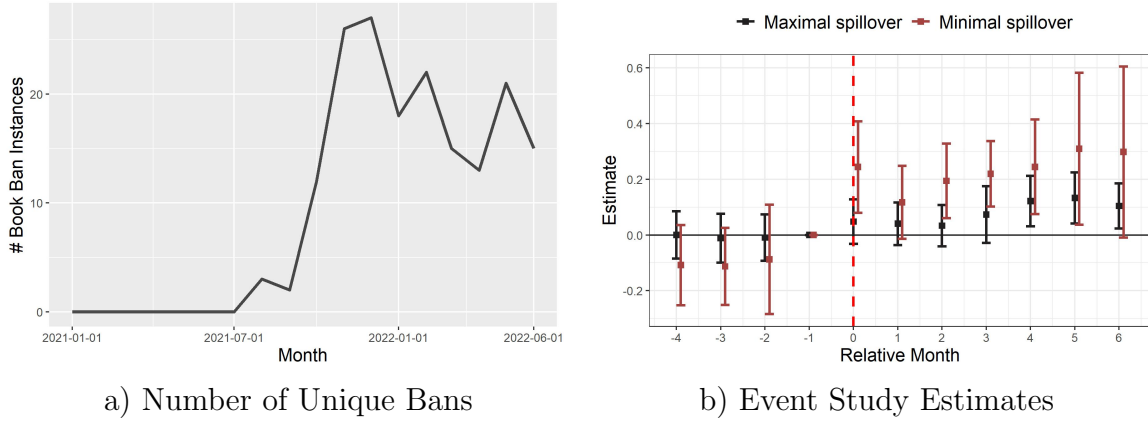

Note: The figure in panel a) shows the total number of unique bans per calendar month. The figure in panel b) shows event study estimates using the TWFE estimator with the log of circulation as the dependent variable. It plots the estimates along with the 95% confidence intervals using two alternate ban event definitions - a single ban event for all the banned books occurring during October 2021 and a separate ban event for each title in each state the title gets banned.

## Additional Measure of Social Chatter: Goodreads Data

We use Goodreads data as an additional measure of social chatter. On Goodreads, an avid community of readers interact by reading, shelving, sharing, and reviewing books. Activity on Goodreads pre vs. post book ban events could help add credence to our results. We run the regression from Equation 1, but since the Goodreads data do not have state-level information, the subscript  $j$  would not apply to this analysis. We use the total number of monthly reviews as an alternative measure of demand.<sup>36</sup> As shown in column (1) of Table A6, there is a positive and statistically significant increase in the number of reviews written for banned books. Next, we analyze the total number of reviews that refer to words related to book bans<sup>37</sup> to find that there is a positive and statistically significant (in column (2)) suggesting that the readers were influenced by news related to book ban. We also look at the average monthly rating for each banned book on Goodreads relative to the control group. In

<sup>36</sup>There is an established relationship between the number of reviews and book demand (Chevalier and Mayzlin 2006, Archak et al. 2011))

<sup>37</sup>We perform a keyword search on the reviews for the terms related to book bans such as “ban”, “banned”, “bans”, “censorship”, “censor”, “library”, “libraries”, “profanity”, “sexual”, “classroom”, “challenge”, “challenges”, “porn”, “pornography” to identify reviews related to book bans.

Table A2: Impact of Ban Events on Circulation of Other Books

| Dependent Variable:           | Log(Circulation)  |                    |                   |
|-------------------------------|-------------------|--------------------|-------------------|
|                               | Genre<br>(1)      | BISAC<br>(2)       | Author<br>(3)     |
| <i>Variables</i>              |                   |                    |                   |
| PostBan × Banned              | -0.024<br>(0.060) | -0.0005<br>(0.091) | -0.056<br>(0.035) |
| PostBan × Banned × SameGenre  | -0.028<br>(0.089) |                    |                   |
| PostBan × Banned × SameBISAC  |                   | -0.034<br>(0.110)  |                   |
| PostBan × Banned × SameAuthor |                   |                    | 0.021<br>(0.055)  |
| State Fixed Effect            | Yes               | Yes                | Yes               |
| Title Fixed Effect            | Yes               | Yes                | Yes               |
| Year Month Fixed Effect       | Yes               | Yes                | Yes               |
| R <sup>2</sup>                | 0.60122           | 0.54188            | 0.60145           |
| Observations                  | 481,418           | 1,046,670          | 200,298           |

Note: Robust standard errors clustered at the level of the state in parentheses. The unit of observation is state-title-month. The dependent variable is the log of circulation. All the banned books are excluded from the sample. SameGenre indicates if a book is of the same genre as banned books. SameBISAC indicates if a book has the same BISAC as the banned book BISACs. SameAuthor indicates if a book is authored by an author of banned books.

\*\*\* $p < 0.01$ ; \*\* $p < 0.05$ ; \* $p < 0.1$ .

column (3), we find an increase in the ratings for the book post-ban. Based on an alternative dataset, these results increase confidence in the overall takeaways of the paper.

It might be that some of the reviews written were motivated in the contentiousness of the issue (for example, reviews written “in solidarity” with the author or completely against the books) — some reviewers are perhaps not reading the book, but are either rating and reviewing the books positively or negatively depending on their viewpoint of the ban. If this is the case, there should be less information in reviews that are written after the first ban. However, we find that there is no change in the number of words in reviews after the ban (b=2.07, p=0.82). There is also no change in the number of days it takes for the reviewers

Figure A4: Event Study Estimates using Matched Controls

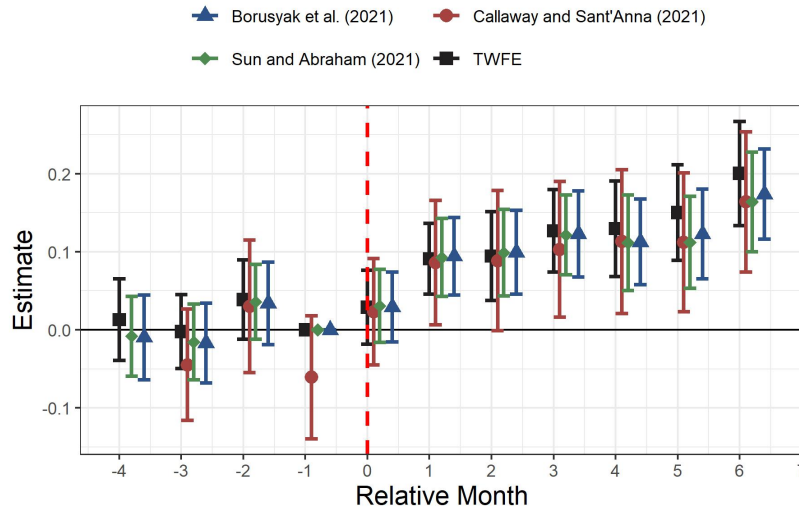

Note: The figure shows event study estimates using four different estimation methods and control book titles derived using matching. The dependent variable is the log of circulation. The unit of observation is at the title-state-month level. 95% confidence intervals are shown.

to start and finish a book (mean is 8 days while median is 3, both pre and post ban). Both analyses provide descriptive evidence that the review information is not biased one way or another by readers who are not actually reading the book.

In terms of magnitudes, given that the number of reviews increased by 13%, with the mean number of reviews per banned book in a month was 47.2, indicating that six additional reviews were written. This effect is economically significant, as only a small fraction (less than 5% based on publicly available estimates) leave reviews on Goodreads and online platforms, more generally. Further, in column (3), we find that the average rating increases by 0.29 for the banned books after the ban event. This magnitude is economically meaningful according to the literature (Luca 2016). The change in average ratings could result from a change in the type of reader who reads the book in the aftermath of a book ban. As the composition of readers changes, the average star rating can also change, as has been pointed out in related studies by Zhu et al. (2023) and Kovács and Sharkey (2014).

Table A3: Matched Controls: Impact of Ban Events on Circulation

| Dependent Variable:                                         | Log(Circulation)    |                      |                          |                          |                           |                     |                     |
|-------------------------------------------------------------|---------------------|----------------------|--------------------------|--------------------------|---------------------------|---------------------|---------------------|
|                                                             | All States<br>(1)   | Banned States<br>(2) | Non-banned States<br>(3) | Author Experience<br>(4) | Twitter Visibility<br>(5) | Blue States<br>(6)  | Red States<br>(7)   |
| <i>Variables</i>                                            |                     |                      |                          |                          |                           |                     |                     |
| PostBan $\times$ Banned                                     | 0.092***<br>(0.016) | 0.103***<br>(0.023)  | 0.077***<br>(0.022)      | -0.028<br>(0.022)        | -0.008<br>(0.021)         | 0.096***<br>(0.020) | 0.089***<br>(0.027) |
| PostBan $\times$ Banned $\times$<br>Less-experienced Author |                     |                      |                          | 0.231***<br>(0.032)      |                           |                     |                     |
| PostBan $\times$ Banned $\times$<br>High Visibility         |                     |                      |                          |                          | 0.211***<br>(0.037)       |                     |                     |
| State Fixed Effect                                          | Yes                 | Yes                  | Yes                      | Yes                      | Yes                       | Yes                 | Yes                 |
| Title Fixed Effect                                          | Yes                 | Yes                  | Yes                      | Yes                      | Yes                       | Yes                 | Yes                 |
| Year Month Fixed Effect                                     | Yes                 | Yes                  | Yes                      | Yes                      | Yes                       | Yes                 | Yes                 |
| R <sup>2</sup>                                              | 0.68425             | 0.67711              | 0.70149                  | 0.68485                  | 0.68475                   | 0.70462             | 0.67899             |
| Observations                                                | 28,044              | 16,974               | 11,070                   | 28,044                   | 28,044                    | 14,760              | 13,284              |

Note: Robust standard errors clustered at the level of the state in parentheses. The unit of observation is state-title-month. The dependent variable is log of circulation. PostBan is an indicator variable which denotes if the time period is after the month following the first time the title is banned in any state. PostBan is 0 for all control titles. Banned indicates whether the title belongs to the banned or control group. Column (1) includes all the states, column (2) includes only those states with at least one ban event, column (3) includes only those states without any ban events, column (6) includes only Red states, and column (7) includes only Blue states. Column (4) includes author experience as interaction variable and column (5) includes Twitter visibility as interaction variable.

\*\*\* $p < 0.01$ ; \*\* $p < 0.05$ ; \* $p < 0.1$ .

Figure A5: Event Study Estimates using Alternate Time Window

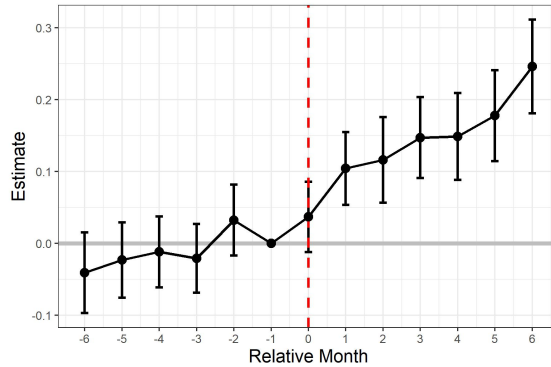

Note: The figure shows the event study estimates using the TWFE estimator with the log of circulation as the dependent variable. It plots the estimates along with the 95% confidence intervals using time window of 6 months before the first ban and 6 months after the first ban.

Figure A6: Leave One Out TWFE Estimates

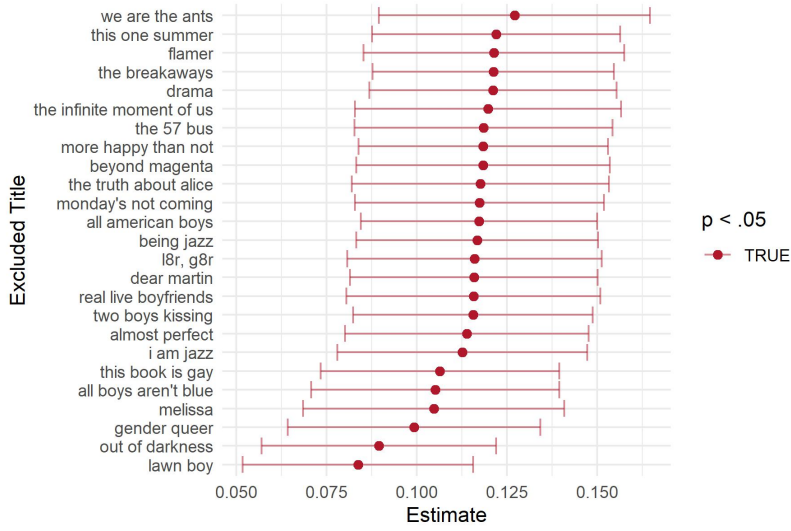

Note: The figure shows estimates using leave one out TWFE estimates. Each dot represents the TWFE estimates after leaving the title on the y axis out of the analyses. 95% confidence intervals are shown.

Figure A7: Leave One Out TWFE Estimates - Heterogeneity

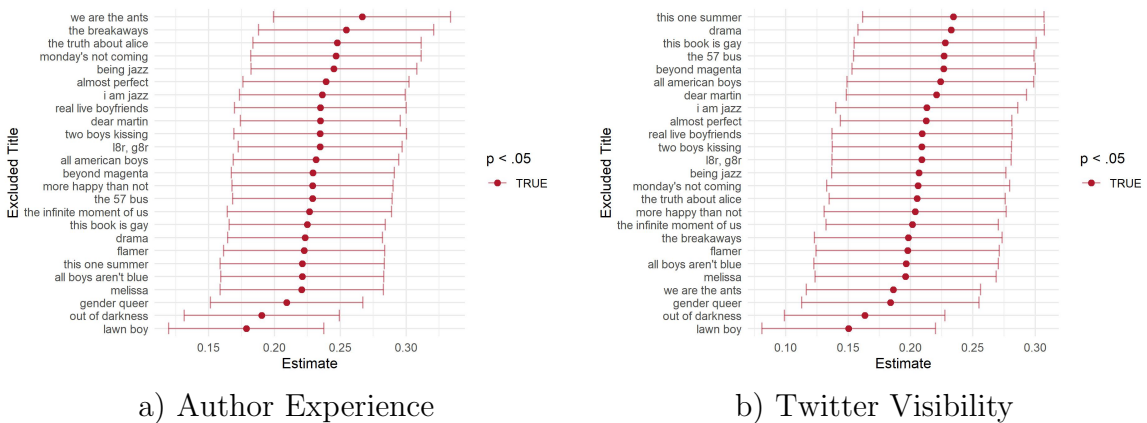

Note: The figure in panel a) shows the estimates from leave-one-out analyses moderated by author experience. The figure in panel b) shows the estimates from leave-one-out analyses moderated by twitter visibility. 95% confidence intervals are shown.

Table A4: Impact of Ban Events on Circulation

| Dependent Variables:       | Circulation         |                     | Lift               |                     | Log(Circulation)    |                  |                      |
|----------------------------|---------------------|---------------------|--------------------|---------------------|---------------------|------------------|----------------------|
|                            | IHS                 | Negative Binomial   | Category Lift      | Mean Lift           | Organic Growth      | False Treatment  | Alternate Pre-period |
|                            | (1)                 | (2)                 | (3)                | (4)                 | (5)                 | (6)              | (7)                  |
| <i>Variables</i>           |                     |                     |                    |                     |                     |                  |                      |
| PostBan × Banned           | 0.139***<br>(0.020) | 0.211***<br>(0.067) | 0.315**<br>(0.135) | 0.462***<br>(0.145) | 0.127***<br>(0.029) | 0.023<br>(0.019) | 0.123***<br>(0.018)  |
| State Fixed Effect         | Yes                 | Yes                 | Yes                | Yes                 | Yes                 | Yes              | Yes                  |
| Title Fixed Effect         | Yes                 | Yes                 | Yes                | Yes                 | Yes                 | Yes              | Yes                  |
| Year Month Fixed Effect    | Yes                 | Yes                 | Yes                | Yes                 |                     | Yes              | Yes                  |
| Quarter-State Fixed Effect |                     |                     |                    |                     | Yes                 |                  |                      |
| Quarter Fixed Effect       |                     |                     |                    |                     | Yes                 |                  |                      |
| R <sup>2</sup>             | 0.57200             |                     | 0.32475            | 0.30993             | 0.58110             | 0.53950          | 0.57821              |
| Observations               | 249,660             | 243,090             | 249,660            | 249,660             | 249,660             | 249,850          | 251,560              |

Note: Robust standard errors clustered at the level of the state in parentheses. The unit of observation is state-title-month. The dependent variable is log of circulation. Columns (1) and (2) test for alternate model specification using inverse hyperbolic sine transformation and negative binomial models respectively. Columns (3) and (4) use category lift and mean lift in circulation as the dependent variable. Column (5) tests for organic growth assumption. Column (6) tests for falsification of treatment timing. Column (7) tests for the alternate pre-period window.

\*\*\* $p < 0.01$ ; \*\* $p < 0.05$ ; \* $p < 0.1$ .

Figure A8: Histogram of Number of Bans per Title

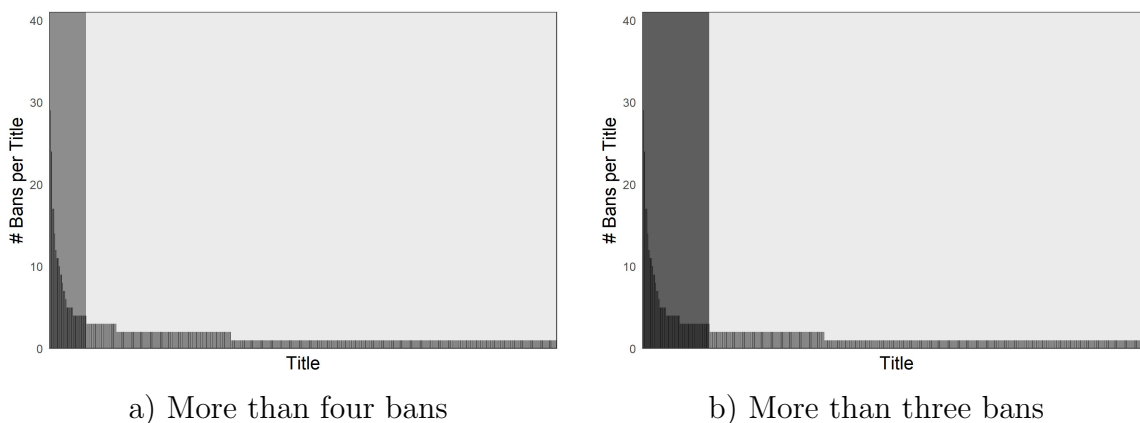

Note: The figure shows the distribution of the number of total ban events per title arranged by the decreasing count of ban events. The marked area in panel a) shows books that are banned four or more times. The marked area in panel b) shows books that are banned three or more times.

Table A5: Additional Robustness: Impact of Ban Events on Circulation

| Dependent Variable:                 | Log(Circulation)                |                                  |                                 |                                  |                             |                                 |
|-------------------------------------|---------------------------------|----------------------------------|---------------------------------|----------------------------------|-----------------------------|---------------------------------|
|                                     | At least<br>Four<br>Bans<br>(1) | At least<br>Three<br>Bans<br>(2) | At least<br>Four<br>Bans<br>(3) | At least<br>Three<br>Bans<br>(4) | Impact<br>Per<br>Ban<br>(5) | More<br>vs. Less<br>Bans<br>(6) |
| <i>Variables</i>                    |                                 |                                  |                                 |                                  |                             |                                 |
| PostBan × Banned                    | 0.049**<br>(0.018)              | 0.031**<br>(0.014)               | 0.203**<br>(0.072)              | 0.155**<br>(0.068)               | -0.011<br>(0.018)           | 0.010<br>(0.009)                |
| PostBan × Banned × Intensity of Ban |                                 |                                  |                                 |                                  | 0.021***<br>(0.002)         |                                 |
| PostBan × Banned × ≥ Five Bans      |                                 |                                  |                                 |                                  |                             | 0.097***<br>(0.015)             |
| State Fixed Effect                  | Yes                             | Yes                              | Yes                             | Yes                              | Yes                         | Yes                             |
| Title Fixed Effect                  | Yes                             | Yes                              | Yes                             | Yes                              | Yes                         | Yes                             |
| Year Month Fixed Effect             | Yes                             | Yes                              | Yes                             | Yes                              | Yes                         | Yes                             |
| R <sup>2</sup>                      | 0.59327                         | 0.59922                          | 0.55316                         | 0.55587                          | 0.57659                     | 0.62823                         |
| Observations                        | 257,602                         | 268,242                          | 146,712                         | 147,214                          | 249,660                     | 421,382                         |

Note: Robust standard errors clustered at the level of the state in parentheses. The unit of observation is state-title-month. The dependent variable is the log of circulation. Columns (1) and (3) use all the books that were banned at least four times. Columns (2) and (4) use all the books that were banned at least three times. Columns (1) - (2) show the average estimates using the main event identification assumption. Columns (3) and (4) show the average estimates using an alternate event identification assumption. Column (5) uses monthly cumulative count of bans as explanatory variable. Column (6) uses all the banned books with split of ban counts as interaction variable.

\*\*\* $p < 0.01$ ; \*\* $p < 0.05$ ; \* $p < 0.1$ .

Table A6: Impact of Ban Events on Goodreads reviews

| Dependent Variables:    | Reviews            | Reviews<br>with Bans | Ratings            |
|-------------------------|--------------------|----------------------|--------------------|
|                         | (1)                | (2)                  | (3)                |
| <i>Variables</i>        |                    |                      |                    |
| PostBan $\times$ Banned | 0.131**<br>(0.054) | 0.183**<br>(0.073)   | 0.298**<br>(0.116) |
| Title Fixed Effect      | Yes                | Yes                  | Yes                |
| Year Month Fixed Effect | Yes                | Yes                  | Yes                |
| R <sup>2</sup>          | 0.87292            | 0.79331              | 0.32797            |
| Observations            | 2,738              | 2,738                | 2,738              |

Note: Heteroskedasticity-robust standard errors in parentheses. The unit of observation is title-month. Columns (1) and (2) use log count of reviews as the dependent variable. Column (1) includes all the reviews, and column (2) includes only those reviews with reference to book bans. Column (3) uses numerical rating as the dependent variable and includes all the reviews.

\*\*\* $p < 0.01$ ; \*\* $p < 0.05$ ; \* $p < 0.1$ .
